# Supplementary material for: LncRNA‐ZXF1 stabilizes P21 expression in endometrioid endometrial carcinoma by inhibiting ubiquitination‐mediated degradation and regulating the miR‐378a‐3p/PCDHA3 axis
Source: PubMed Central journal article supplement (PMC8807357; doi:10.1002/1878-0261.12940), 2021-03-22
Supplement: MOL2-16-813-s001.pdf [file MOL2-16-813-s001.pdf]

# S1

a

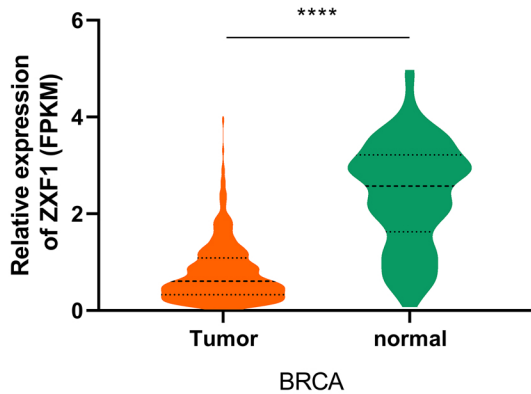

b

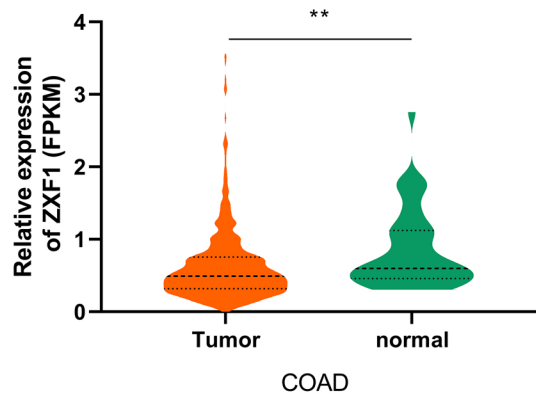

c

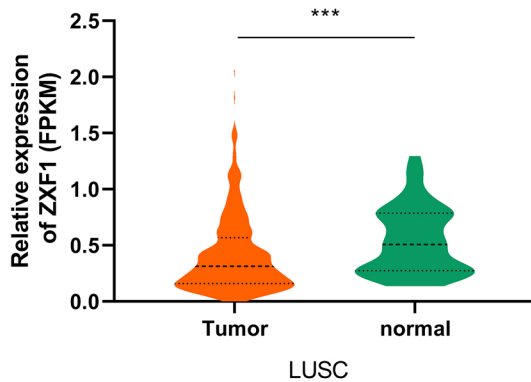

d

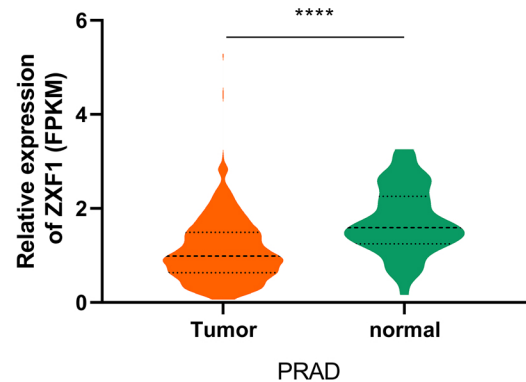

S1 ZXF1 expression in several tumors of TCGA. In BRCA, COAD, LUSC and PRAD, the expression of ZXF1 was lower in tumor tissues than in normal controls.

\* $P < 0.01$ , \*\*\* $P < 0.001$ , \*\*\*\* $P < 0.0001$  by Mann-Whitney test.

S2

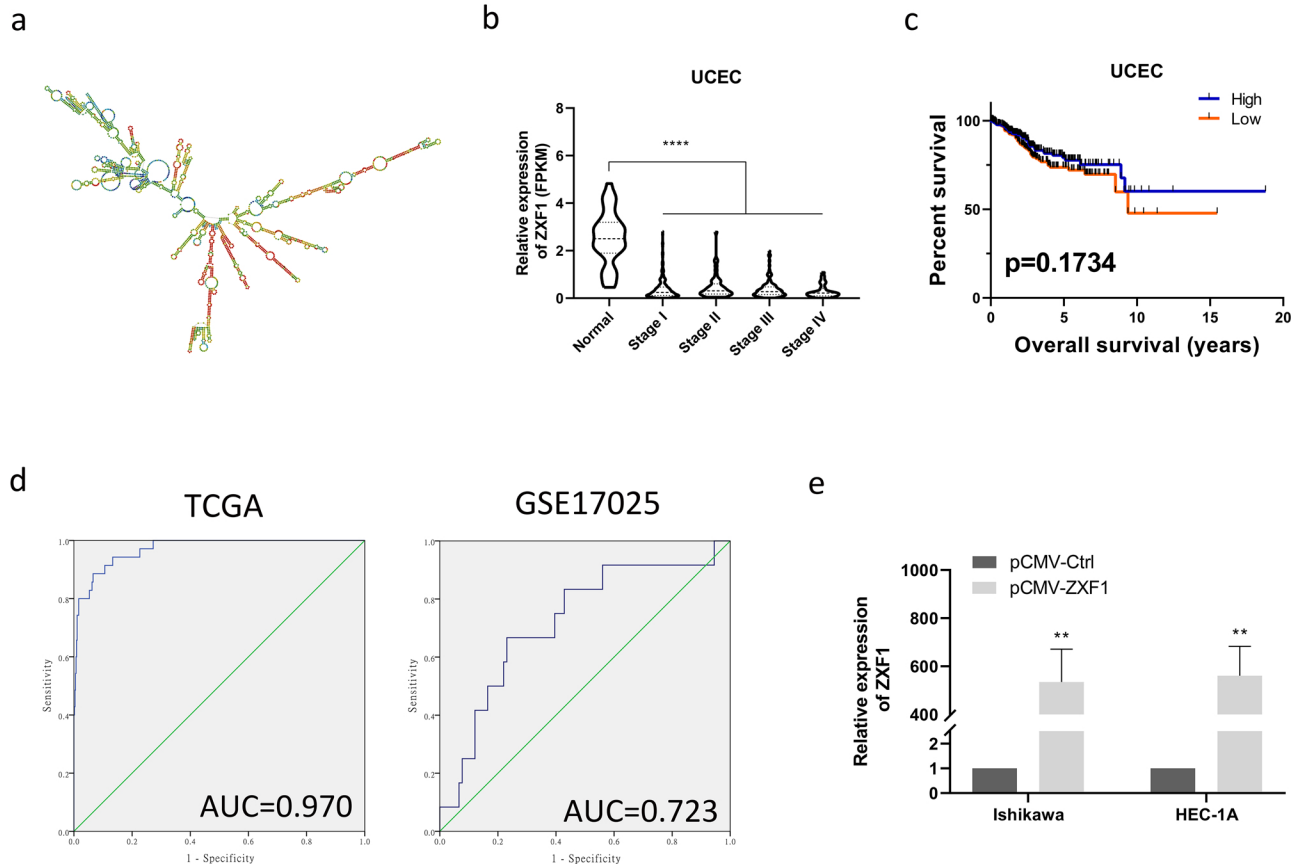

S2 a. Predicted secondary structure of ZXF1 (<http://rna.tbi.univie.ac.at>). b. Different expressions of UCEC at various stages. In the TCGA data, ZXF1 was statistically different between the normal control group and each tumor stage. But there was no difference between different tumor stages. c. Overall survival(OS) was analyzed using TCGA survival data, with the median as the boundary to divide the samples into two groups. d. ROC analysis of ZXF1 was performed using expression data from TCGA and GSE17025, respectively. e. After overexpression of ZXF1 in Ishikawa and HEC-1A, qRT-PCR was used to detect the overexpression efficiency.

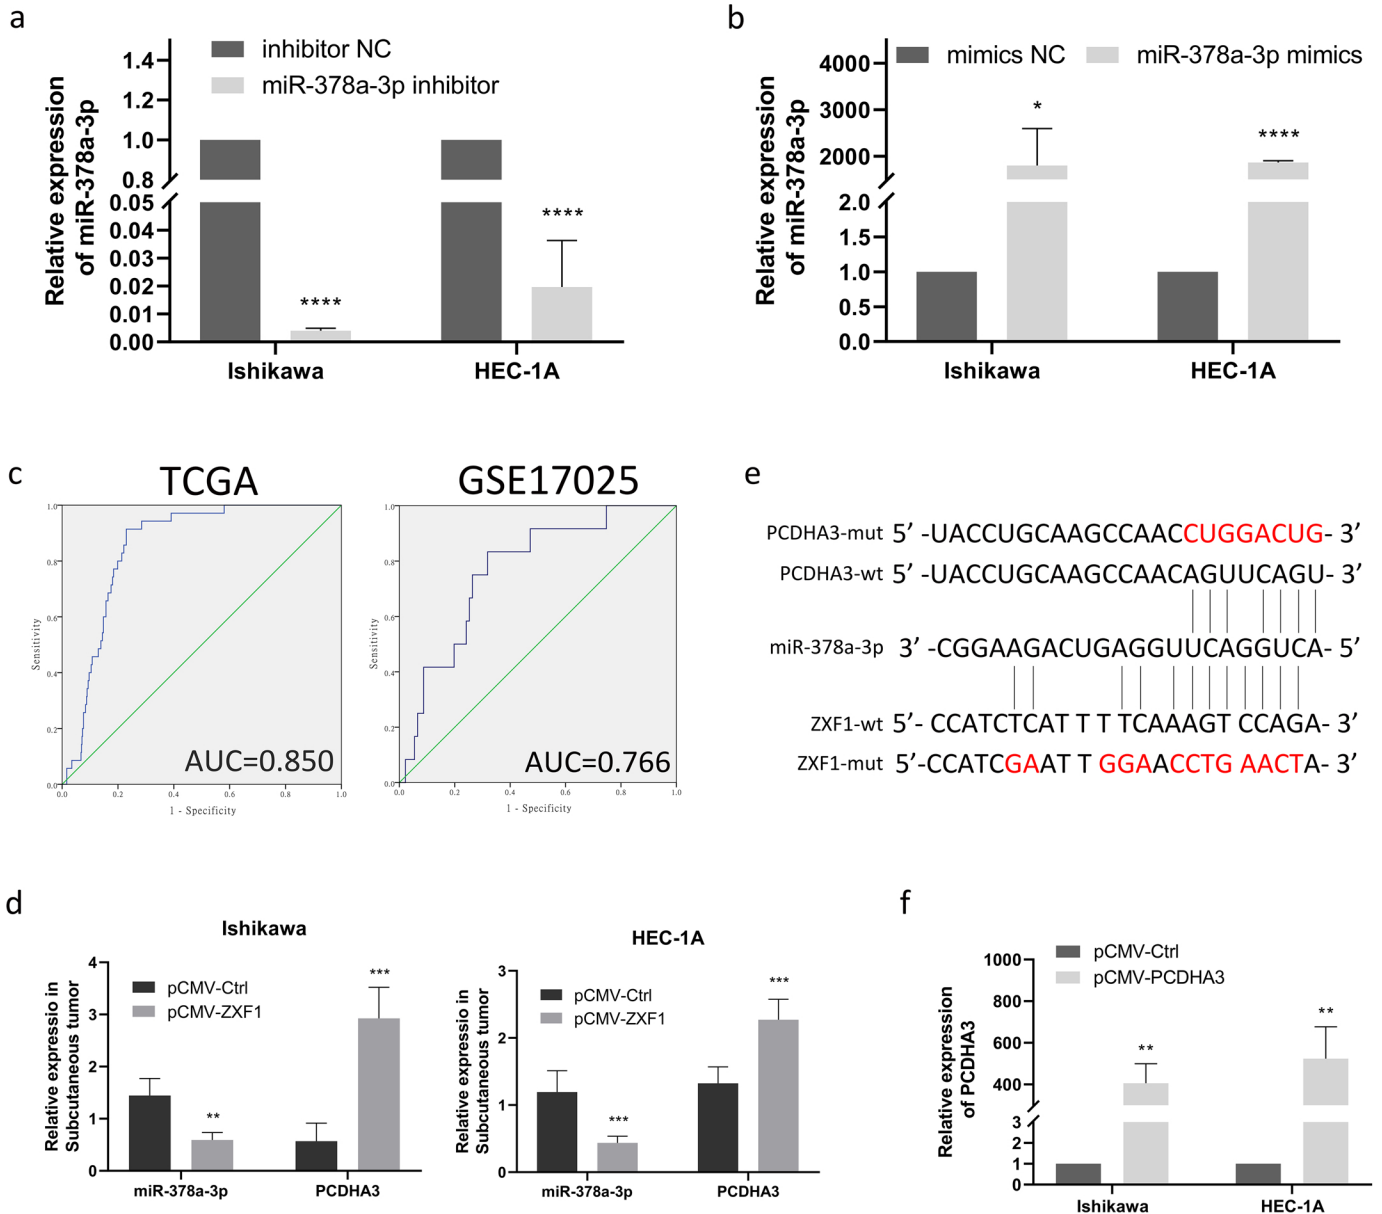

S3 a-b. The transfection efficiency was measured after transfection of miR-378a-3p inhibitor and mimics in EEC cell lines. c. Analysis of PCDHA3 expression data in TCGA and GSE17025, ROC analysis was consistent with the results of Qilu Hospital. The ROC curve shows that PCDHA3 has good sensitivity and specificity as a diagnostic marker. d. In tumors obtained in vivo experiments, the expression of miR-378a-3p decreased, while PCDHA3 increased. e. The sequence of wild type and mutant type of PCDHA3 and ZXF1 constructed in the dual luciferase report experiment. f. PCDHA3 was transfected into Ishikawa and HEC-1A cells and used to detect transfection overexpression efficiency.

S4

a

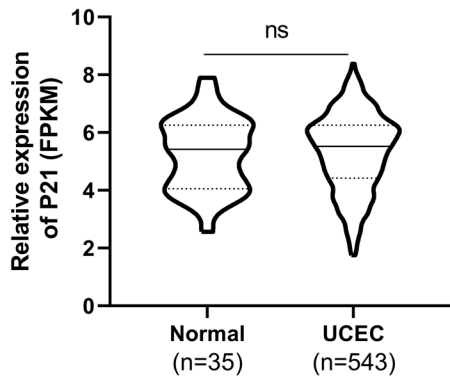

b

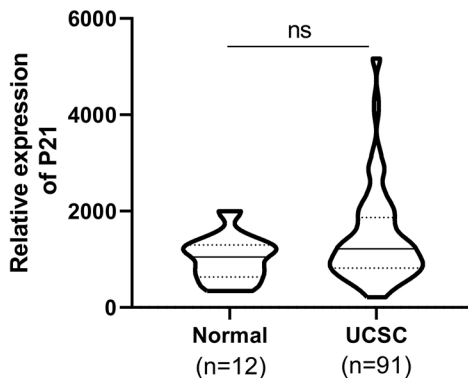

c

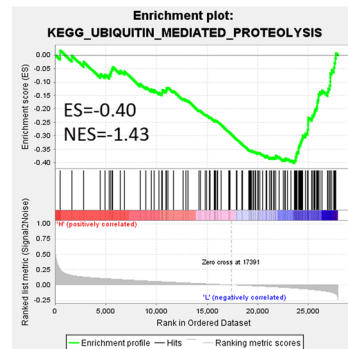

S4 a-b. In UCEC data of TCGA (a) and GSE17025 (b), there was no difference in the expression of P21 between tumor tissue and normal control group. c. All samples were divided into two groups according to the expression of ZXF1 in TCGA, and then GSEA analysis was performed. The result showed that Ubiquitin mediated proteolysis was enriched.

Supplementary Table. 1 Antibodies and drugs used in this experiment

| Antibody/Chemical                | Company     | Catalog#   | Species | Experiment                                               |
|----------------------------------|-------------|------------|---------|----------------------------------------------------------|
| ACTB                             | CST         | 4970       | Rabbit  | Western blot(1/1000)                                     |
| P21                              | CST         | 2947       | Rabbit  | Western blot(1/1000),IHC(1/50),<br>RIP(1/50),co-IP(1/50) |
| MMP2                             | Abcam       | ab92536    | Rabbit  | Western blot(1/1000)                                     |
| E-cadherin                       | CST         | 14472      | Mouse   | Western blot(1/1000)                                     |
| N-cadherin                       | CST         | 13116      | Rabbit  | Western blot(1/1000)                                     |
| CDC20                            | Proteintech | 10252-1-AP | Rabbit  | Western blot(1/1000),co-IP(1/50)                         |
| PCDHA3                           | Proteintech | 18803-1-AP | Rabbit  | Western blot(1/1000),co-IP(1/50)                         |
| Flag-tag                         | CST         | 14793      | Rabbit  | Western blot(1/1000),co-IP(1/50)                         |
| AGO2                             | CST         | 2897       | Rabbit  | RIP(1/50)                                                |
| Myc-tag                          | Proteintech | 16286-1-AP | Rabbit  | Western blot(1/1000),co-IP(1/50)                         |
| HA                               | Affinity    | T0050      | Rabbit  | Western blot(1/1000)                                     |
| Ki67                             | Servicebio  | GB13030-2  | Rabbit  | IHC(1/200)                                               |
| Cycloheximide                    | CST         | 2112       |         |                                                          |
| MG132                            | Selleckchem | S2619      |         |                                                          |
| D-Luciferin,<br>Potassium Salt D | YEASEN      | 40902ES02  |         |                                                          |

Supplementary Table. 2 Primers and nucleotide sequence used in this experiment

| Gene Symbol           | Forword primer            | Reverse primer         |
|-----------------------|---------------------------|------------------------|
| ZXF1                  | CTACCGATGAAGGATGGCTGG     | ACCTGTGCAGACCCTAATGTT  |
| ACTB                  | CATCCCCCAAAGTTCACAAT      | AGTGGGGTGGCTTTTAGGAT   |
| PCDHA3                | CTCACTGGCACGACTCAAC       | GGCTTCTACCTGGATTTCATA  |
| P21                   | GACCTGTCACTGTCTTGACCC     | AAGATCAGCCGGCGTTTG     |
| CDC20                 | TTCCTTCCCTGCCAGACCGTA     | TGCCACAGCCAAGTAGTT     |
| U6                    | CAGCACATATACTAAAATTGGAACG | CGAATTTGCGTGTCATCC     |
| miR-378a-3p           | ATGGTGGACTGGACTTGGAGT     | GTGCAGGGTCCGAGGT       |
| miR-378a-3p inhibitor | GCCUUCUGACUCCAAGUCCAGU    |                        |
| miR-378a-3p mimics    | ACUGGACUUGGAGUCAGAAGGC    | CUUCUGACUCCAAGUCCAGUUU |
